# Supplementary material for: Distribution and prediction of catalytic domains in 2-oxoglutarate dependent dioxygenases
Source: PubMed Central journal article supplement (PMC3475032; doi:10.1186/1756-0500-5-410), 2012-08-04
Supplement: 1756-0500-5-410-S1.pdf [file 1756-0500-5-410-S1.pdf]

| Table S1: uniprot ids of template sequences used in this work |            |        |          |  |                                                             |  |
|---------------------------------------------------------------|------------|--------|----------|--|-------------------------------------------------------------|--|
| Prot. Family<br>(This study)                                  | Uniprot id | PDB id | Refs.    |  |                                                             |  |
| ALKB<br>(30 - 35)                                             | **P05050   | 2FD8   | 30       |  | (*) sequence id used to create generic 2-OG profile         |  |
|                                                               | **Q6NS38   | 2IUW   | 30       |  |                                                             |  |
|                                                               | **Q96Q83   | 3BUC   | 31       |  |                                                             |  |
|                                                               | **Q9C0B1   | 3LFM   | 32       |  |                                                             |  |
|                                                               | Q5XKLO     |        | 33       |  | (**) PDB id of sequence used to create generic 2-OG profile |  |
| ARGI<br>(36 - 39)                                             | **Q05581   | 1DRT   | 36       |  |                                                             |  |
|                                                               | **Q6WZB0   | 2WBP   | 37       |  |                                                             |  |
|                                                               | Q05582     |        | 38       |  |                                                             |  |
| ASPA<br>(40 - 48)                                             | Q9NWT6     | 1H2L   | 40       |  |                                                             |  |
|                                                               | Q9Z4Z5     | 2OG7   | 41       |  |                                                             |  |
|                                                               | Q12797     | 3RCQ   | 42       |  |                                                             |  |
|                                                               | *Q28056    |        | 43       |  |                                                             |  |
|                                                               | *Q8BSY0    |        | 44       |  |                                                             |  |
|                                                               | Q5HZW3     |        | 45, 46   |  |                                                             |  |
|                                                               | *Q9GQ82    |        | 44       |  |                                                             |  |
| ATSK<br>(227, 228)                                            | **Q9WWU5   | 1OIK   | 227, 228 |  |                                                             |  |
| CHLO<br>(49 - 52)                                             | **Q9RBY6   | 2FCT   | 49       |  |                                                             |  |
|                                                               | **D0VX22   | 3GJB   | 50       |  |                                                             |  |
|                                                               | *Q87W55    |        | 51       |  |                                                             |  |
| CLAS<br>(36, 38)                                              | **Q05581   | 1DRT   | 36       |  |                                                             |  |
|                                                               | *Q05582    |        | 38       |  |                                                             |  |
| COLY<br>(53 - 63)                                             | Q6NYC1     | 3K2O   | 53       |  |                                                             |  |
|                                                               | *O00469    |        | 54       |  |                                                             |  |
|                                                               | *Q63321    |        | 55       |  |                                                             |  |
|                                                               | *Q5U367    |        | 56       |  |                                                             |  |
|                                                               | Q9R0E1     |        | 57       |  |                                                             |  |
|                                                               | Q9R0B9     |        | 57       |  |                                                             |  |
|                                                               | Q9R0E2     |        | 57       |  |                                                             |  |
|                                                               | Q20679     |        | 58       |  |                                                             |  |
|                                                               | Q91ZW6     |        | 59       |  |                                                             |  |
|                                                               | *O60568    |        | 60       |  |                                                             |  |
|                                                               | Q811A3     |        | 56       |  |                                                             |  |
|                                                               | A8WIN7     |        | 61       |  |                                                             |  |
|                                                               | A4U7F8     |        | 61       |  |                                                             |  |
|                                                               | Q1L618     |        | 62       |  |                                                             |  |
| CP3H<br>(64 - 72)                                             | O09345     | 1E5R   | 64       |  |                                                             |  |
|                                                               | *Q4KLM6    |        | 65, 66   |  |                                                             |  |

|                    |          |      |        |  |  |  |
|--------------------|----------|------|--------|--|--|--|
|                    | *Q9R1J8  |      | 67     |  |  |  |
|                    | *Q8IVL6  |      | 68     |  |  |  |
|                    | *Q8IVL5  |      | 68     |  |  |  |
|                    | Q32P28   |      | 69     |  |  |  |
|                    | Q3V1T4   |      | 69     |  |  |  |
|                    | Q8CG70   |      | 68     |  |  |  |
|                    | Q6JHU8   |      | 70     |  |  |  |
|                    | Q8CG71   |      | 68, 71 |  |  |  |
|                    |          |      |        |  |  |  |
| CP4H               | **A8J7D3 | 2JIG | 73     |  |  |  |
| (73 - 82)          | **Q81LZ8 | 3ITQ | 74     |  |  |  |
|                    | P13674   | 2V5F | 75     |  |  |  |
|                    | O15460   |      | 76, 77 |  |  |  |
|                    | Q05DA4   |      | 76, 77 |  |  |  |
|                    | *Q9ZW86  |      | 78     |  |  |  |
|                    | *F4JAU3  |      | 79     |  |  |  |
|                    | Q84406   |      | 80     |  |  |  |
|                    | Q75ZI4   |      | 81     |  |  |  |
|                    |          |      |        |  |  |  |
| CYCL               | Q05581   | 1DRT | 36     |  |  |  |
| (36, 38, 83)       | **Q9I1L4 | 3EAT | 83     |  |  |  |
|                    | Q05582   |      | 38     |  |  |  |
|                    |          |      |        |  |  |  |
| DACS               | **P18548 | 1UOB | 84     |  |  |  |
| (84 - 89)          | *Q03047  |      | 85     |  |  |  |
|                    | *P11935  |      | 86     |  |  |  |
|                    | *P42220  |      | 87     |  |  |  |
|                    | P42219   |      | 88     |  |  |  |
|                    |          |      |        |  |  |  |
| DSAT               | Q05581   | 1DRT | 36     |  |  |  |
| (36, 38, 90 - 105) | **Q96323 | 1GP5 | 90     |  |  |  |
|                    | Q9XB59   | 1NX8 | 91     |  |  |  |
|                    | Q7XZQ8   |      | 92     |  |  |  |
|                    | Q7XZQ6   |      | 93     |  |  |  |
|                    | Q9ZWQ9   |      | 94     |  |  |  |
|                    | Q96330   |      | 95, 96 |  |  |  |
|                    | Q05964   |      | 97     |  |  |  |
|                    | Q07512   |      | 98     |  |  |  |
|                    | Q52T40   |      | 99     |  |  |  |
|                    | A0EKE7   |      | 99     |  |  |  |
|                    | B6A7R4   |      | 100    |  |  |  |
|                    | D0UZK7   |      | 101    |  |  |  |
|                    | Q0EDG6   |      | 102    |  |  |  |
|                    | Q2PGC5   |      | 103    |  |  |  |
|                    | Q2PGC6   |      | 103    |  |  |  |
|                    | Q2PHJ7   |      | 103    |  |  |  |
|                    | Q2PHK4   |      | 103    |  |  |  |
|                    | Q2PHK5   |      | 103    |  |  |  |
|                    | B2M0X8   |      | 104    |  |  |  |
|                    | Q05582   |      | 38     |  |  |  |

|                |          |      |         |  |  |  |  |
|----------------|----------|------|---------|--|--|--|--|
| ECTO           | **Q2TDY4 | 3EMR | 106     |  |  |  |  |
| (106 - 109)    | *Q6QUY7  |      | 107     |  |  |  |  |
|                | *Q93RV9  |      | 108     |  |  |  |  |
|                | *Q1RPP0  |      | 109     |  |  |  |  |
| FLAV           | **Q96323 | 1GP5 | 90      |  |  |  |  |
| (90, 92 - 104) | Q7XZQ8   |      | 92      |  |  |  |  |
|                | *Q7XZQ6  |      | 93      |  |  |  |  |
|                | *Q9ZWQ9  |      | 94      |  |  |  |  |
|                | *Q96330  |      | 95, 96  |  |  |  |  |
|                | Q05964   |      | 97      |  |  |  |  |
|                | Q07512   |      | 98      |  |  |  |  |
|                | Q52T40   |      | 99      |  |  |  |  |
|                | A0EKE7   |      | 99      |  |  |  |  |
|                | B6A7R4   |      | 100     |  |  |  |  |
|                | D0UZK7   |      | 101     |  |  |  |  |
|                | Q0EDG6   |      | 102     |  |  |  |  |
|                | Q2PGC5   |      | 103     |  |  |  |  |
|                | Q2PGC6   |      | 103     |  |  |  |  |
|                | Q2PHJ7   |      | 103     |  |  |  |  |
|                | Q2PHK4   |      | 103     |  |  |  |  |
|                | Q2PHK5   |      | 103     |  |  |  |  |
|                | B2M0X8   |      | 104     |  |  |  |  |
| GBBH           | **O75936 | 3N6W | 110     |  |  |  |  |
| (110 - 114)    | *P80193  |      | 111     |  |  |  |  |
|                | *Q924Y0  |      | 112     |  |  |  |  |
|                | *A6QQL2  |      | 113     |  |  |  |  |
| GIAC           | Q39103   |      | 115     |  |  |  |  |
| (115 - 150)    | Q0JH50   |      | 116,117 |  |  |  |  |
|                | Q39110   |      | 118,119 |  |  |  |  |
|                | *Q8LEA2  |      | 120     |  |  |  |  |
|                | Q39112   |      | 119     |  |  |  |  |
|                | Q9XFR9   |      | 120     |  |  |  |  |
|                | Q9C6I4   |      | 121     |  |  |  |  |
|                | O49561   |      | 121     |  |  |  |  |
|                | Q9SQ80   |      | 122,123 |  |  |  |  |
|                | Q9ZT84   |      | 124     |  |  |  |  |
|                | Q39111   |      | 119     |  |  |  |  |
|                | O64692   |      | 120     |  |  |  |  |
|                | Q9C971   |      | 123     |  |  |  |  |
|                | P93771   |      | 125     |  |  |  |  |
|                | P0C5H5   |      | 116,117 |  |  |  |  |
|                | Q9SVS8   |      | 126     |  |  |  |  |
|                | Q9XHM5   |      | 122     |  |  |  |  |
|                | Q3I411   |      | 127     |  |  |  |  |
|                | O04705   |      | 127     |  |  |  |  |
|                | Q9XG83   |      | 120     |  |  |  |  |

|  |         |  |         |  |  |  |  |
|--|---------|--|---------|--|--|--|--|
|  | Q3I410  |  | 127     |  |  |  |  |
|  | Q3I409  |  | 127     |  |  |  |  |
|  | O04707  |  | 127     |  |  |  |  |
|  | O04706  |  | 127     |  |  |  |  |
|  | Q941N1  |  | 128     |  |  |  |  |
|  | Q941N2  |  | 128     |  |  |  |  |
|  | A7LCJ5  |  | 129     |  |  |  |  |
|  | Q9FS86  |  | 130     |  |  |  |  |
|  | Q9FS85  |  | 130     |  |  |  |  |
|  | C0LZW8  |  | 128     |  |  |  |  |
|  | C0LZW9  |  | 128     |  |  |  |  |
|  | Q9FS84  |  | 130     |  |  |  |  |
|  | O23762  |  | 131     |  |  |  |  |
|  | Q8GT56  |  | 132     |  |  |  |  |
|  | Q9M4A0  |  | 133     |  |  |  |  |
|  | Q8GUE8  |  | 132     |  |  |  |  |
|  | O24417  |  | 134     |  |  |  |  |
|  | Q7X9N5  |  | 132     |  |  |  |  |
|  | O23763  |  | 135     |  |  |  |  |
|  | *Q8GT57 |  | 132     |  |  |  |  |
|  | Q9M4P2  |  | 132     |  |  |  |  |
|  | Q9M499  |  | 133     |  |  |  |  |
|  | Q41366  |  | 136     |  |  |  |  |
|  | *Q8GSN6 |  | 137     |  |  |  |  |
|  | Q5D0G3  |  | 138     |  |  |  |  |
|  | Q8GSN7  |  | 137     |  |  |  |  |
|  | Q8GSN5  |  | 137     |  |  |  |  |
|  | O04281  |  | 139     |  |  |  |  |
|  | *O04280 |  | 139     |  |  |  |  |
|  | O04282  |  | 139     |  |  |  |  |
|  | Q4W8C0  |  | 140     |  |  |  |  |
|  | Q4W8C3  |  | 140     |  |  |  |  |
|  | Q4W8C4  |  | 140     |  |  |  |  |
|  | Q4W8C1  |  | 140     |  |  |  |  |
|  | B2MWW5  |  | 141     |  |  |  |  |
|  | A4GVL8  |  | 141     |  |  |  |  |
|  | A4GVL7  |  | 141     |  |  |  |  |
|  | A4GVL9  |  | 141     |  |  |  |  |
|  | A4GVL5  |  | 141     |  |  |  |  |
|  | Q9ZPP4  |  | 141,143 |  |  |  |  |
|  | Q9ZPP2  |  | 141     |  |  |  |  |
|  | Q9ZPP3  |  | 141     |  |  |  |  |
|  | A3FAV1  |  | 142     |  |  |  |  |
|  | A0FK57  |  | 144     |  |  |  |  |
|  | A7LNI6  |  | 143     |  |  |  |  |
|  | A4GVL6  |  | 141     |  |  |  |  |
|  | Q9ZWR7  |  | 145     |  |  |  |  |
|  | Q9ZWR6  |  | 145     |  |  |  |  |
|  | Q4W8C2  |  | 140     |  |  |  |  |
|  | E1AXG4  |  | 146     |  |  |  |  |

|             |          |      |             |  |  |  |
|-------------|----------|------|-------------|--|--|--|
|             | Q96498   |      | 147         |  |  |  |
|             | *E1AXG6  |      | 146         |  |  |  |
|             | E1AXG5   |      | 146         |  |  |  |
|             | Q9ZWQ1   |      | 148         |  |  |  |
|             | Q9FXV7   |      | 149         |  |  |  |
|             | Q9FXW1   |      | 150         |  |  |  |
|             | Q9FXV6   |      | 148,149     |  |  |  |
|             | Q9ZWP9   |      | 148         |  |  |  |
|             | Q9FXW0   |      | 150         |  |  |  |
|             | Q9ZWQ2   |      | 148         |  |  |  |
|             | O04277   |      | 139         |  |  |  |
|             |          |      |             |  |  |  |
| HILY        | **Q80Y84 | 2EQY | 151,152     |  |  |  |
| (151 - 190) | Q9H3R0   | 2XML | 153,154     |  |  |  |
|             | O15054   | 2XXZ | 155,156     |  |  |  |
|             | Q9BY66   | 2YQE | 157,158     |  |  |  |
|             | Q6B0I6   | 3DXT | 153,159     |  |  |  |
|             | P29375   | 3GL6 | 160-162     |  |  |  |
|             | Q9UPP1   | 3K3O | 163,164     |  |  |  |
|             | Q6ZMT4   | 3KV6 | 163,165     |  |  |  |
|             | Q9VMJ7   | 2LM1 | 166-168     |  |  |  |
|             | *Q9V333  |      | 169         |  |  |  |
|             | *Q9V6L0  |      | 170         |  |  |  |
|             | O15550   |      | 171         |  |  |  |
|             | O70546   |      | 172         |  |  |  |
|             | Q5NCY0   |      | 171,173     |  |  |  |
|             | Q8N371   |      | 174         |  |  |  |
|             | Q6PCM1   |      | 175,176     |  |  |  |
|             | Q69ZK6   |      | 177         |  |  |  |
|             | Q6ZPY7   |      | 178         |  |  |  |
|             | P41229   | 2JRZ | 179,180     |  |  |  |
|             | O75164   | 2Q8C | 181,182     |  |  |  |
|             | Q09519   |      | 183,184     |  |  |  |
|             | *Q9VL07  |      | 185,186     |  |  |  |
|             | Q9LT40   |      | 187         |  |  |  |
|             |          |      |             |  |  |  |
| HP4H        | *Q96KS0  |      | 191-194     |  |  |  |
| (191 - 204) | *Q9H6Z9  |      | 192,194     |  |  |  |
|             | Q86KR9   |      | 195         |  |  |  |
|             | Q9NWT6   | 1H2L | 196-198     |  |  |  |
|             | **Q9GZT9 | 2G19 | 192,194,199 |  |  |  |
|             | **P40032 | 3KT1 | 200         |  |  |  |
|             | Q8N543   |      | 201         |  |  |  |
|             | Q11120   |      | 202         |  |  |  |
|             |          |      |             |  |  |  |
| HYOS        | *P24397  |      | 205         |  |  |  |
| (205 - 211) | *O04847  |      | 206,207     |  |  |  |
|             | *B2CNC8  |      | 208         |  |  |  |
|             | *Q6V0J1  |      | 209         |  |  |  |
|             | Q6EZB3   |      | 210         |  |  |  |

|             |          |      |         |  |  |  |  |
|-------------|----------|------|---------|--|--|--|--|
|             | A9Q1G4   |      | 211     |  |  |  |  |
| NUHY        | *Q4QZZ9  |      | 212,213 |  |  |  |  |
| (212 - 219) | *Q7SEI7  |      | 213     |  |  |  |  |
|             | Q6CHN2   |      | 213     |  |  |  |  |
|             | *B6EU02  |      | 214     |  |  |  |  |
|             | *P86938  |      | 215,216 |  |  |  |  |
|             | *C5I496  |      | 217     |  |  |  |  |
|             | *Q7RYZ9  |      | 218,219 |  |  |  |  |
| OGFD        | *Q8N543  |      | 201     |  |  |  |  |
| (201, 202)  | *Q11120  |      | 202     |  |  |  |  |
| PHYT        | **O14832 | 2A1X | 220     |  |  |  |  |
| (220 - 225) | **Q5SRE7 | 3OBZ | 221     |  |  |  |  |
|             | *P57093  |      | 222     |  |  |  |  |
|             | *O35386  |      | 223     |  |  |  |  |
|             | *Q9ZVF6  |      | 224     |  |  |  |  |
| PTLH        | Q82IZ1   | 2RDN | 226     |  |  |  |  |
| (226)       |          |      |         |  |  |  |  |
| SULF        | **Q9WWU5 | 1OIK | 227,228 |  |  |  |  |
| (227 - 231) | **P37610 | 1GQW | 229,230 |  |  |  |  |
|             | *Q12358  |      | 231     |  |  |  |  |
| TDLP        | P37610   | 1GQW | 229,230 |  |  |  |  |
| (229 - 231) | Q12358   |      | 231     |  |  |  |  |
| TFDA        | *P10088  |      | 232,233 |  |  |  |  |
| (232 - 236) | Q8KSC8   |      | 234     |  |  |  |  |
|             | *Q700X4  |      | 234     |  |  |  |  |
|             | *Q208A9  |      | 234,235 |  |  |  |  |
|             | Q67FR0   |      | 236     |  |  |  |  |
|             | *Q67FS3  |      | 236     |  |  |  |  |
| THYD        | B6EU02   |      | 214     |  |  |  |  |
| (214 - 216) | P86938   |      | 215,216 |  |  |  |  |
| THYE        | C5I496   |      | 217     |  |  |  |  |
| (217 - 219) | Q7RYZ9   |      | 218,219 |  |  |  |  |
| XANT        | Q4QZZ9   |      | 212,213 |  |  |  |  |
| (212, 213)  | Q7SEI7   |      | 213     |  |  |  |  |
|             | Q6CHN2   |      | 213     |  |  |  |  |
