# Supplementary material for: Distribution and prediction of catalytic domains in 2-oxoglutarate dependent dioxygenases
Source: PubMed Central journal article supplement (PMC3475032; doi:10.1186/1756-0500-5-410), 2012-08-04
Supplement: 1756-0500-5-410-S4.pdf [file 1756-0500-5-410-S4.pdf]

**Table S4: Details of HMM profiles used in this work**

| Profile | Structs. | Seqs | Sequence pattern of identical amino acids in alignment with highlighted active site residues <sup>#</sup>                                                                                                                                                                                                                                                                                                                                                                                                                                                                                                                                                                                                                                                                                                                                                                                                                                                                                                                                                                                                                                                                                                                                                                         |
|---------|----------|------|-----------------------------------------------------------------------------------------------------------------------------------------------------------------------------------------------------------------------------------------------------------------------------------------------------------------------------------------------------------------------------------------------------------------------------------------------------------------------------------------------------------------------------------------------------------------------------------------------------------------------------------------------------------------------------------------------------------------------------------------------------------------------------------------------------------------------------------------------------------------------------------------------------------------------------------------------------------------------------------------------------------------------------------------------------------------------------------------------------------------------------------------------------------------------------------------------------------------------------------------------------------------------------------|
| ALKB    | 4        | 1    | <b>N</b> <sub>x{10,25}</sub> <b>H</b> <sub>x{1}</sub> <b>D</b> <sub>x{12,14}</sub> <b>S</b> <sub>x{25,45}</sub> <b>G</b> <sub>x{13,14}</sub> <b>H</b>                                                                                                                                                                                                                                                                                                                                                                                                                                                                                                                                                                                                                                                                                                                                                                                                                                                                                                                                                                                                                                                                                                                             |
| ARGI    | 2        | 1    | T <sub>x{7,8}</sub> ALAx <sub>{9,10}</sub> D <sub>x{3}</sub> FL <sub>x{2}</sub> A <sub>x{3}</sub> A <sub>x{2}</sub> LP <sub>x{2}</sub> L <sub>x{15,16}</sub> L <sub>x{2}</sub> RG <sub>x{1}</sub> PV <sub>x{1,2}</sub> D <sub>x{2}</sub> L <sub>x{2}</sub> TP <sub>x{19}</sub><br>L <sub>x{4}</sub> LG <sub>x{3}</sub> G <sub>x{6}</sub> G <sub>x{1}</sub> V <sub>x{2}</sub> DV <sub>x{1}</sub> P <sub>x{2}</sub> G <sub>x{1,2}</sub> H <sub>x{1}</sub> L <sub>x{1}</sub> <b>S</b> <sub>x{2}</sub> <b>S</b> <sub>x{3}</sub> L <sub>x{2}</sub> <b>HTE</b> <sub>x{1}</sub> A <sub>x{7}</sub> <b>YV</b> <sub>x{1}</sub><br><b>L</b> <sub>x{3}</sub> R <sub>x{6,8}</sub> <b>T</b> <sub>x{4}</sub> V <sub>x{1,3}</sub> L <sub>x{2}</sub> LDE <sub>x{1}</sub> T <sub>x{3}</sub> L <sub>x{9}</sub> D <sub>x{15,30}</sub> V <sub>x{2}</sub> L <sub>x{1}</sub> G <sub>x{4}</sub> P <sub>x{1}</sub> L <sub>x{2}</sub> D <sub>x{4}</sub> AP <sub>x{1</sub><br>,3}D <sub>x{5}</sub> A <sub>x{3}</sub> L <sub>x{4}</sub> D <sub>x{7}</sub> L <sub>x{2}</sub> GD <sub>x{4}</sub> DN <sub>x{1}</sub> R <sub>x{2}</sub> <b>H</b> <sub>x{1}</sub> <b>R</b> <sub>x{2}</sub> F <sub>x{1}</sub> PR <sub>x{1}</sub> DG <sub>x{1}</sub> <b>DRWL</b> <sub>x{1}</sub> <b>R</b> <sub>x{2}</sub> I<br>x{2}D |
| ASPA    | 3        | 4    | H                                                                                                                                                                                                                                                                                                                                                                                                                                                                                                                                                                                                                                                                                                                                                                                                                                                                                                                                                                                                                                                                                                                                                                                                                                                                                 |
| CHLO    | 2        | 1    | F <sub>x{9}</sub> F <sub>x{3}</sub> G <sub>x{1}</sub> IGP <sub>x{5}</sub> PEEM <sub>x{7}</sub> R <sub>x{2}</sub> L <sub>x{2}</sub> R <sub>x{2}</sub> A <sub>x{1}</sub> Y <sub>x{9,10}</sub> <b>NYDRHL</b> D <sub>x{1}</sub> D <sub>x{1}</sub> L <sub>x{2}</sub> H <sub>x{2}</sub> R <sub>x{1}</sub><br>{1}E <sub>I</sub> <sub>x{2}</sub> R <sub>V</sub> <sub>x{1}</sub> <b>S</b> <sub>x{2}</sub> G <sub>x{4}</sub> <b>CWR</b> <sub>x{1}</sub> <b>E</b> F <sub>x{1}</sub> <b>PKY</b> <sub>x{1}</sub> G <sub>x{1}</sub> EGTD <b>WHQA</b> <sub>x{1}</sub> <b>TF</b> A <sub>x{1}</sub> A <sub>x{1}</sub> G <sub>x{1}</sub> <b>PQ</b> <sub>x{2}</sub><br>2}WP <sub>x{4,5}</sub> F <sub>x{1}</sub> G <sub>x{1}</sub> I <sub>x{1}</sub> <b>VW</b> T <sub>x{1}</sub> FT <sub>x{5}</sub> NGC <sub>x{1}</sub> Q <sub>x{2}</sub> PG <sub>x{4,52}</sub> A <sub>x{1}</sub> P <sub>x{3}</sub> K <sub>x{1}</sub> G <sub>x{3}</sub> IF <sub>x{1}</sub> <b>S</b> <sub>x{2}</sub><br>2} <b>MH</b> <sub>x{1}</sub> <b>S</b> <sub>x{1}</sub> P <sub>x{7,8}</sub> R <sub>x{1}</sub> G <sub>x{3}</sub> <b>RYVP</b> <sub>x{2}</sub> V <sub>x{1}</sub> VYP <sub>x{13}</sub> L <sub>x{3}</sub> G <sub>x{1}</sub> V <sub>x{3}</sub> G <sub>x{6}</sub> NR <sub>x{7}</sub> G                                  |
| CLAS    | 1        | 1    | M <sub>x{1}</sub> <b>S</b> <sub>x{0,2}</sub> VDCT <sub>x{1}</sub> Y <sub>x{2}</sub> EL <sub>x{1}</sub> ALAx <sub>{2}</sub> LP <sub>x{2}</sub> PRADL <sub>x{2}</sub> FLD <sub>x{1}</sub> A <sub>x{1}</sub> T <sub>x{1}</sub> AA <sub>x{1}</sub> LP <sub>x{2}</sub> LA<br>x{1}ALDTFN <sub>A</sub> <sub>x{1}</sub> GSEDG <sub>x{1}</sub> LLLRGLPV <sub>x{1,2}</sub> D <sub>x{2}</sub> LP <sub>x{1}</sub> TP <sub>x{1}</sub> STPAP <sub>x{1}</sub> DR <sub>x{2}</sub> L <sub>x{1}</sub> MEAM <sub>x{2}</sub><br>}L <sub>x{1}</sub> GRRLGLHTGY <sub>x{1}</sub> ELRSGTVYHDVYPSGAH <sub>x{1}</sub> LS <b>SETSETLLEFHTE</b> MA <b>Y</b> H <sub>x{1}</sub> LQPNYVMLA<br>CSRADHE <sub>x{2}</sub> A <sub>x{1}</sub> TLV <sub>x{1}</sub> SVRKALPLLDE <sub>x{1}</sub> TRARL <sub>x{1}</sub> DR <sub>x{2}</sub> PCCV <b>DVA</b> FRGGVDDPGAIA <sub>x{1}</sub> V<br>KPLYGD <sub>A</sub> <sub>x{1}</sub> DPFLGYDRELLAPEDPADKEAV <sub>A</sub> <sub>x{1}</sub> LS <sub>x{1}</sub> ALD <sub>x{1}</sub> VT <sub>x{2}</sub> V <sub>x{1}</sub> L <sub>x{1}</sub> PGD <sub>x{1}</sub> LI <sub>x{1}</sub><br>DNFR <b>TT</b> HARTPFSPRWGKDR <b>WLHRVY</b> IRTDRNG <sub>x{1}</sub> LSGGERAGD <sub>x{3}</sub> F <sub>x{1}</sub> PR                                                                            |
| COLY    | 1*       | 13   | R <sub>x{130,172}</sub> W                                                                                                                                                                                                                                                                                                                                                                                                                                                                                                                                                                                                                                                                                                                                                                                                                                                                                                                                                                                                                                                                                                                                                                                                                                                         |
| CP3H    | 1*       | 9    | H <sub>x{27}</sub> F <sub>x{65,73}</sub> E <sub>x{17}</sub> P <sub>x{52,115}</sub> P <sub>x{2}</sub> P <sub>x{3,4}</sub> F <sub>x{27,48}</sub> S <sub>x{2}</sub> H <sub>x{17}</sub> S <sub>x{19,77}</sub> V <sub>x{1}</sub> A <sub>x{5}</sub> R <sub>x{5}</sub> W                                                                                                                                                                                                                                                                                                                                                                                                                                                                                                                                                                                                                                                                                                                                                                                                                                                                                                                                                                                                                 |

|             |    |    |                                                                                                                                                                                                                                                                                                                                                                                                                    |
|-------------|----|----|--------------------------------------------------------------------------------------------------------------------------------------------------------------------------------------------------------------------------------------------------------------------------------------------------------------------------------------------------------------------------------------------------------------------|
| <b>CP4H</b> | 3  | 6  | ----                                                                                                                                                                                                                                                                                                                                                                                                               |
| <b>CYCL</b> | 2  | 1  | Sx{3,4}LLLRGx{7,27}Ex{41,48}Hx{4}Yx{4}Px{6}Cx{2}Ax{7,8}Tx{3}Sx{3}ALx{1}Lx{1}Dx{5,8}Rx{9,12}Ax{41,52}Ex{2}Ax{1}Lx{3}Lx{12,14}Dx{2}Ix{1}DNx{4}Hx{1}Rx{8,11}Rx{1}Lx{1}RVx{1}Ix{12}R                                                                                                                                                                                                                                   |
| <b>DACS</b> | 1  | 4  | VPx{1}Fx{4}Lx{2}Gx{12,13}Gx{1}FYLx{3}Gx{14,15}DFFx{2}Gx{3}EKx{1}AVx{7}RRGx{3}LEx{1}ESTAx{2}Tx{1}TGx{1}Yx{1}DYSx{3}SMGx{3}Nx{1}FPx{3}FEx{2}Wx{2}YFx{3}Yx{1}Ax{4}ARx{1}VLx{3}Gx{14,17}Px{1}Lx{1}Ry{1}RyFPx{1}VPEx{1}Rx{1}AEx{2}Px{1}RMx{1}PHYDLSx{2}Tx{3}QTx{1}CANGFVSLQx{1}Ex{2}Gx{5}Px{4}Ax{2}Vx{1}CGAx{3}Lx{3}Gx{3}APx{1}Hx{1}Vx{2}Px{6}GSx{1}RTSSVFLRPx{2}DFx{1}Fx{1}Vx{3}Rx{2}Gx{2}Vx{4}Ex{2}TFx{2}Wx{1}Gx{1}NY |
| <b>DSAT</b> | 3  | 18 | ----                                                                                                                                                                                                                                                                                                                                                                                                               |
| <b>ECTO</b> | 1  | 3  | Dx{1}YPx{1}Rx{8,11}Rx{1}Dx{1}Vx{8,11}Px{5}Lx{6}GFLx{8}DEVx{9}Lx{12}Ix{1}Ex{2}Sx{3}RSx{1}Fx{1}VHx{5}Fx{5}Dx{1}Rx{5}Rx{3}Gx{1}DVYVHQSRINx{1}KPGFx{4}Fx{1}WHSDFETWHx{1}EDGx{1}Px{1}Mx{3}Sx{1}SIx{1}Lx{2}Nx{3}NGx{1}LMx{2}PGSHx{2}Fx{2}Cx{1}Gx{1}TPx{4}Kx{1}SLx{2}Qx{2}Gx{1}Px{2}Ex{1}Lx{7}Gx{0,1}Ix{3}TGx{1}AGx{4}Fx{2}Nx{2}HGSx{2}Nx{2}Px{2}Rx{1}Nx{1}Fx{1}Vx{1}Nx{3}Nx{4}Px{6}RP                                    |
| <b>FLAV</b> | 1  | 17 | Rx{3}Ex{13,19}Px{17,24}Ax{3}WGx{6}Hx{16}FFx{1}Lx{3}EKx{26,32}Wx{9}Px{8}WPx{2}Px{9}Yx{14}LSx{3}Gx{5}Lx{13,16}Nx{1}YPx{1}CPx{1}Px{1}Lx{1}LGx{3}HTDx{4}Tx{6}Vx{1}GLQx{6,8}Wx{14}GDx{5}SNGx{6}Hx{3}Vx{5}Rx{1}Sx{3}Fx{2}Px{7,8}P                                                                                                                                                                                        |
| <b>GBBH</b> | 1* | 3  | Ax{5}Ax{6}Wx{1}Dx{3}Sx{5}WLRDNCx{1}Cx{1}DCx{10}Lx{23,24}Wx{3}Hx{1}Sx{5}WLx{7}Qx{5,7}Ex{3}Px{4}Wx{5}LPx{6}Vx{3}Dx{5}WLx{5}VGx{3}Lx{1}Gx{5}Gx{4}Lx{1}KRx{2}Fx{6}Gx{4}Vx{2}Kx{1}DAx{3}AYTx{3}Lx{2}HTDx{1}Px{5}PGx{5}C                                                                                                                                                                                                 |
| <b>GIAC</b> | 0  | 81 | Gx{3}Hx{1}Dx{13}Gx{8,12}Wx{15,16}Dx{6}N                                                                                                                                                                                                                                                                                                                                                                            |

|             |    |    |                                                                                                                                                                                                                                                                                                                                                                                                                                                                                      |
|-------------|----|----|--------------------------------------------------------------------------------------------------------------------------------------------------------------------------------------------------------------------------------------------------------------------------------------------------------------------------------------------------------------------------------------------------------------------------------------------------------------------------------------|
| <b>HILY</b> | 11 | 12 | -----                                                                                                                                                                                                                                                                                                                                                                                                                                                                                |
| <b>HP4H</b> | 3  | 5  | -----                                                                                                                                                                                                                                                                                                                                                                                                                                                                                |
| <b>HYOS</b> | 0  | 6  | ATx{5}Sx{7,28}Fx{11}Vx{2}Gx{3,6}Px{1}Ix{1}Lx{7,13}Vx{2}Ix{2}Ax{4}Gx{1}FQx{2}NHGx{1}Px{3}Mx{9}Fx{18,26}Kx{2}LYx{13}Wx{1}DTx{13,17}Ex{1}Px{3}Rx{4}KYSx{3}Rx{1}Lx{9}Ex{1}LGLKx{14,15}Lx{2}YYPx{1}CPx{1}Px{2}Tx{1}Gx{3}Hx{1}Dx{4}Tx{1}Lx{1}Qx{3}Gx{2}Qx{6,7}Wlx{1}Vx{2}IPx{1}Ax{1}Vx{1}Nx{4}Lx{4}Nx{1}Kfx{4}HRVx{7}Rx{1}Sx{5}Gx{8,15}Px{1}KELx{4}NPPx{1}YKx{6}Fx{2}Ix{13}Px{3}N                                                                                                          |
| <b>NUHY</b> | 0  | 7  | G                                                                                                                                                                                                                                                                                                                                                                                                                                                                                    |
| <b>OGFD</b> | 0  | 2  | Gx{6}Vx{3}Fx{21}Px{2}Hx{1}Vlx{8,21}Lx{4}KELMx{3,4}Fx{1}EKx{2}Dx{1}Yx{3}Qx{1,7}Dx{1}Lx{1}Kx{8}LRx{4,8}Ex{1}FRSx{4}Ix{6,8}Sx{2}Dx{1}Sx{3}Yx{5}Lx{2}HDDx{4}Rx{1}Ix{2}ILYLVx{1}Px{0,3}Wx{4}GGx{1}Lx{1}Lx{6,7}Fx{7}Sx{2}Px{1}WNx{1}Lx{1}FFx{1}Vx{1}Px{1,2}SFHx{1}Vx{1}EVx{3,4}Kx{1}Rx{2}ISGWfHx{1}Px{4}Px{1,4}NYx{17}Lx{7}Yx{16}Sx{7}Lx{1}Px{4}Kx{9}Vx{31,33}SEx{2}Fx{9}Kx{3}Lx{4}Ex{4,12}Dlx{9}Px{9}Sx{5}Sx{2}Qx{8,13}Sx{18}Lx{6}Ax{16}Px{13}Dx{2}LLx{6}Nx{3}LVYRDx{3}Lx{1}FVKx{10,19}WD |
| <b>PHYT</b> | 2  | 3  | Lx{3}Qx{7}Gx{1}LVx{51,82}Kx{36,38}Mx{1}Ix{1}Kx{1}Px{8,11}HQDx{7}Px{6,7}Wx{1}Ax{1}Ex{5}NGCLx{3}PGx{1}Hx{29,33}Vx{6}Gx{5}Hx{4}Hx{1}Sx{2}Nx{5}Rx{1}Ax{3}H                                                                                                                                                                                                                                                                                                                               |
| <b>SULF</b> | 2  | 1  | AAx{6}Px{3}Lx{47}Hx{3}Gx{13}Ix{7}Sx{11}Tx{18}Dx{7}Ax{49}Lx{9}Gx{2}Ix{1}Gx{2}Lx{3}Lx{16}Vx{3}Rx{1}Qx{17}Gx{4}Hx{36}WHTDVx{6}Px{10}Px{2}GGDTx{7}Ax{3}Lx{2}Px{7}Lx{3}Hx{19}Rx{13}HPx{1}VRx{1}HPx{6}Lx{5}Fx{3}Ix{7}Sx{2}Lx{3}Lx{12}Rx{2}Wx{6}IWDNRx{2}QHx{1}Ax{2}Dx{6}Rx{3}Rx{1}Tx{5}P                                                                                                                                                                                                   |
| <b>TDLP</b> | 1  | 1  | Lx{6}Px{2}Gx{2}Ix{1}Gx{4,5}LSDx{5}Lx{3}Vx{4}VVx{2}Rx{1}Qx{3,6}Px{9}FGx{1}LHIHx{4}Hx{5}Ex{8,17}Dx{7}WHTDVx{5}PPx{8}Ex{1}Px{2}GGDTLx{4}Ix{1}Ax{3}LSx{1}Px{4}LSx{1}Lx{3}Hx{6,14}Ex{1}7}HPx{1}VRx{1}HPVx{2}Kx{2}Lx{1}VNx{2}Fx{3}IVx{5}ESEx{1}LLx{1}FLx{9,10}Qx{1}Rx{2}Wx{1}Px{4}IWDNRx{2}QHx{1}Ax{2}Dx{5,17}Rx{7}Lx{1}Dx{3}Y                                                                                                                                                             |

|             |   |   |                                                                                                                                                                                                                                                                                                                                                                                                                                                                                                                                                                                                                                                                                                                                                                        |
|-------------|---|---|------------------------------------------------------------------------------------------------------------------------------------------------------------------------------------------------------------------------------------------------------------------------------------------------------------------------------------------------------------------------------------------------------------------------------------------------------------------------------------------------------------------------------------------------------------------------------------------------------------------------------------------------------------------------------------------------------------------------------------------------------------------------|
| <b>TFDA</b> | 0 | 6 | Px{6}Ax{6}Lx{2,3}Lx{19}Fx{2}Qx{5}Qx{1}Ix{1}Fx{3}FGx{8,23}Ix{16,25}Gx{3,6}WHx{1}DSx{13}Ax{2}VPx{2}GGx{1}Tx{1}Fx{2}Mx{2}Ax{3}Lx{14}Hx{8}Lx{18,27}PLVx{2}Hx{3}GRx{2}Lx{10,11}Gx{3}AEx{4}Lx{2}Lx{3}Ax{10}Wx{7}WDNx{1}Cx{2}Hx{10}R                                                                                                                                                                                                                                                                                                                                                                                                                                                                                                                                          |
| <b>THYD</b> | 0 | 2 | Kx{3}Ex{1}Ax{20}Fx{12}Ax{1}Ex{3}Kx{3}Ex{11}Dx{4}Fx{5,18}Fx{4}Gx{4,7}Vx{1}IPx{3}Px{6}AAx{1}VLEx{1}Ax{5}LRx{4}GGx{2}Px{2}Gx{2}GYx{1}DYx{3}Px{3}KCRx{1}Tx{1}Fx{12}Px{8}Yx{4}Px{1}Hx{3}Qx{2}Ax{1}Px{6}Gx{2}FSTx{1}TVNx{2}FRTAx{1}HTDx{1}GDFx{2}Gx{1}GVLx{1}Vx{2}GEx{2}Gx{2}Lx{7}Fx{5}DVLLFDTx{1}Lx{1}Hx{1}NTEx{7,9}Wx{1}Rx{1}Sx{1}Vx{1}Yx{1}Rx{2}Lx{4}Cx{2}Ex{1}Rx{2}Lx{20}NGx{5}Px{4}Px{2}Lx{1,5}Px{3}AAx{6,12}GCx{2}AMx{3}Lx{0,32}Hx{5}Nx{3}Mx{2}Lx{8}DGLx{15,16}Nx{5}LGx{1,2}Fx{3}Gx{2}Lx{10,17}Dx{8}Gx{10}Rx{2,3}Lx{2}Vx{6}Qx{11}Wx{1}Nx{7,11}Fx{2}Lx{5}Qx{3}Gx{2}Gx{25}Nx{4}Lx{15}Yx{10}Mx{8}Rx{3}Lx{4}Ax{3}Ax{1}Ix{1}DSx{12,13}Qx{13}Ix{12}Ex{11}Gx{3}VLx{9}Rx{14,16}Ix{5}Ax{1}Rx{24}Nx{17}DFx{4}Hx{22}Rx{5}Vx{1}Vx{2}Lx{19,22}Fx{9}Rx{9}Cx{5}Dx{10}Kx{5,11}LNx{8}RE |
| <b>THYE</b> | 0 | 2 | Vx{5,7}Px{1}Ix{1}Fx{2}FLx{1}Gx{4}KLx{1}TAx{3}Lx{6}GFx{2}Lx{1}Nx{5}Dx{5,7}Fx{5}FFx{1}LPx{1}Ex{1}Kx{4}Wx{3}Ex{1}NRGYx{1}Ax{1}GREx{1}VTQx{1}TDPx{2}Ix{1}Kx{1}Rx{2}APDx{1}KEx{2}EIGx{5}Gx{0,1}Px{3}Px{1}Ex{6,10}FKx{2}MNX{1}FFx{5}LHx{1}Ex{1}MRAx{1}Ax{2}MGLx{4}FDx{2}Vx{6}LRLLx{1}YPx{2,4}Ex{2}Klx{2}Gx{2}RAGx{1}Hx{1}DYGSx{1}TLLx{1}QDx{2}GGLx{1}Vx{4}Gx{1}Fx{2}Ax{1}Px{3}TVVvNx{1}GDLLx{1}RWSNDx{2}KSTx{1}HRVVx{1}Px{7,9}Px{1}Rx{1}SIAx{1}Fx{1}NPx{5}Ix{1}Ax{1}PGTx{1,5}Ex{1}KYEx{6}YLVx{1}RLx{2}TY                                                                                                                                                                                                                                                                     |
| <b>XANT</b> | 0 | 3 | Mx{3}Tx{6,10}Px{1}Gx{10,12}Dx{3}Lx{1}Dx{1}DFx{5}ALx{1}Tx{2}Vx{1}Vx{3}Qx{4}Px{2}QYx{2}Tx{1}Rx{1}DPx{4,6}YGHx{8,11}Sx{1}Lx{2}Dx{4}PHQPQVQx{2}Gx{1}Gx{5}EGx{5}Lx{1}HPx{1}Hx{1}TFHx{12,13}TRFYRWHIDx{1}ALYGx{2,5}PPx{2}TTLLx{3}VPx{4,5}Qx{3}Yx{1}Dx{1,2}Gx{9}Tx{1}Fx{1}SGx{6}LSx{6}Ax{4}Vx{1}YAPHPYx{3}Sx{1}Ax{5}GLx{3}Sx{3}Ex{5}LPx{3}Ex{5}LPMx{1}Wx{1}NPx{1}TGx{3}LQx{1}Hx{3}Vx{7}Gx{1}Vx{2,3}Lx{3}Rx{3}Yx{3}RPx{1}Ix{1}Px{2}VYAHx{1}Wx{2}GDLVx{1}FHNx{1}Gx{2}HSVx{1}Gx{1}Fx{3}Ex{1}RLx{2}QCNx{1}Ax{2,25}V                                                                                                                                                                                                                                                               |

(#) Active site residues with side chains oriented towards HATM,

(\*) PDB IDs in absence of HATM

HATM: atoms of Fe (II), 2-OG, and/or substrate
